# Supplementary material for: Feasibility Study on Using Dynamic Contrast Enhanced MRI to Assess the Effect of Tyrosine Kinase Inhibitor Therapy within the STAR Trial of Metastatic Renal Cell Cancer
Source: MDPI journal article supplement (doi:10.3390/diagnostics11071302), 2021-07-20
Supplement: s1 [file s1]

## Supplementary Information

**Table S1.** Baseline and follow-up perfused tumour volume (cm<sup>3</sup>) estimates per measured tumour target lesion for each patient with percentage changes.

| Patient | Target Lesion Site          | Baseline MRI | 4-week Follow-up MRI | % Change from Last Scan | 10-week Follow-up MRI | % Change from Last Scan |
|---------|-----------------------------|--------------|----------------------|-------------------------|-----------------------|-------------------------|
| 1       | Node                        | 2.5          | 1.6                  | -34.2%                  | 0.2                   | -89.1%                  |
| 2       | 1) Spleen                   | 160.5        | 88.5                 | -44.8%                  | 83.7                  | -5.5%                   |
|         | 2) Gastric                  | 437.0        | 107.9                | -75.3%                  | 801.6                 | 643.0%                  |
| 3       | Node                        | 3.2          | 1.6                  | -51.1%                  | 3.7                   | 131.8%                  |
| 4       | 1) Right lobe liver         | 21.8         | 25.4                 | 16.7%                   | 47.1                  | 85.2%                   |
|         | 2) Left lobe liver          | 67.8         | 73.6                 | 8.6%                    | 84.1                  | 14.2%                   |
| 5       | Node                        | 221.5        | 117.7                | -46.8%                  | 212.4                 | 80.4%                   |
| 6       | Left Kidney                 | 9.9          | 4.8                  | -51.1%                  | 3.3                   | -31.2%                  |
| 7       | Right Kidney                | 688.7        | 354.5                | -48.5%                  | 453.5                 | 27.9%                   |
| 8       | Left Kidney                 | 214.9        | 94.1                 | -56.2%                  | 64.9                  | -31.1%                  |
| 9       | Right Kidney                | 72.2         | 41.8                 | -42.1%                  | 46.7                  | 11.7%                   |
| 10      | 1) Nephrectomy Surgical Bed | 72.1         | 41.2                 | -42.8%                  | 49.5                  | 20.0%                   |
|         | 2) Node                     | 30.9         | 19.4                 | -37.3%                  | 8.7                   | -55.2%                  |
| 11      | 1) Node                     | 45.2         | 18.1                 | -60.1%                  | 9.8                   | -45.6%                  |
|         | 2) Node                     | 82.8         | 34.9                 | -57.9%                  | 27.2                  | -22.0%                  |
| 12      | 1) Left Liver               | 14.2         | 7.6                  | -46.5%                  | 19.9                  | 162.5%                  |
|         | 2) Left Kidney (anterior)   | 31.3         | 4.0                  | -87.2%                  | 29.0                  | 626.3%                  |
|         | 3) Left Kidney (lower)      | 21.9         | 9.0                  | -58.9%                  | 13.9                  | 54.8%                   |
|         | 4) Pancreas body            | 24.9         | 7.1                  | -71.6%                  | 14.4                  | 102.7%                  |
|         | 5) Pancreas tail            | 21.5         | 1.7                  | -92.3%                  | 13.3                  | 705.8%                  |
| 13      | 1) Left Kidney              | 426.1        | 361.7                | -15.1%                  | 296.4                 | -18.1%                  |
|         | 2) Pancreas                 | 36.2         | 19.8                 | -45.1%                  | 14.1                  | -29.1%                  |
| 14      | Right Kidney                | 880.4        | 600.8                | -31.8%                  | 233.7                 | -61.1%                  |

**Table S2.** Baseline and follow-up  $K^{\text{trans}}$  (/min) estimates per measured tumor target lesion for each patient with percentage changes.

| Patient | Target Lesion Site          | Baseline MRI | 4-week Follow-up MRI | % Change from Last Scan | 10-week Follow-up MRI | % Change from Last Scan |
|---------|-----------------------------|--------------|----------------------|-------------------------|-----------------------|-------------------------|
| 1       | Node                        | 0.79         | 0.08                 | -90%                    | 0.07                  | -13%                    |
| 2       | 1) Spleen                   | 0.36         | 0.02                 | -94%                    | 0.13                  | 550%                    |
|         | 2) Gastric                  | 0.18         | 0.12                 | -33%                    | 0.13                  | 8%                      |
| 3       | Node                        | 2.52         | 0.16                 | -94%                    | 0.15                  | -6%                     |
| 4       | 1) Right lobe liver         | 0.95         | 0.57                 | -40%                    | 1.36                  | 139%                    |
|         | 2) Left lobe liver          | 0.97         | 0.79                 | -19%                    | 1.76                  | 123%                    |
| 5       | Node                        | 1.15         | 0.25                 | -78%                    | 0.59                  | 136%                    |
| 6       | Left Kidney                 | 0.47         | 0.43                 | -9%                     | 0.75                  | 74%                     |
| 7       | Right Kidney                | 0.58         | 0.39                 | -33%                    | 0.27                  | -31%                    |
| 8       | Left Kidney                 | 1.75         | 0.3                  | -83%                    | 0.24                  | -20%                    |
| 9       | Right Kidney                | 1.19         | 0.84                 | -29%                    | 1.36                  | 62%                     |
| 10      | 1) Nephrectomy Surgical Bed | 0.43         | 0.48                 | 12%                     | 0.31                  | -35%                    |
|         | 2) Node                     | 0.43         | 0.56                 | 30%                     | 0.31                  | -45%                    |
| 11      | 1) Node                     | 1.04         | 0.13                 | -88%                    | 0.18                  | 38%                     |
|         | 2) Node                     | 0.47         | 0.36                 | -23%                    | 0.02                  | -94%                    |
| 12      | 1) Left Liver               | 0.5          | 0.21                 | -58%                    | 0.17                  | -19%                    |
|         | 2) Left Kidney (anterior)   | 0.31         | 0.59                 | 90%                     | 0.45                  | -24%                    |
|         | 3) Left Kidney (lower)      | 0.72         | 1.03                 | 43%                     | 1.07                  | 4%                      |
|         | 4) Pancreas body            | 1.56         | 0.39                 | -75%                    | 1.25                  | 221%                    |
|         | 5) Pancreas tail            | 1.82         | 0.11                 | -94%                    | 1.03                  | 836%                    |
| 13      | 1) Left Kidney              | 0.49         | 0.2                  | -59%                    | 0.21                  | 5%                      |
|         | 2) Pancreas                 | 1.09         | 0.39                 | -64%                    | 0.62                  | 59%                     |
| 14      | Right Kidney                | 0.95         | 0.17                 | -82%                    | 0.13                  | -24%                    |

**Table S3.** Baseline and follow-up extra-cellular volume (ECV) (mL/100 mL) estimates per measured tumour target lesion for each patient with percentage changes.

| Patient | Target Lesion Site          | Baseline MRI | 4-week Follow-up MRI | % Change from Last Scan | 10-week Follow-up MRI | % Change from Last Scan |
|---------|-----------------------------|--------------|----------------------|-------------------------|-----------------------|-------------------------|
| 1       | Node                        | 33           | 4                    | -87%                    | 7                     | 62%                     |
| 2       | 1) Spleen                   | 13           | 7                    | -47%                    | 5                     | -21%                    |
|         | 2) Gastric                  | 12           | 19                   | 64%                     | 7                     | -63%                    |
| 3       | Node                        | 31           | 7                    | -77%                    | 6                     | -12%                    |
| 4       | 1) Right lobe liver         | 35           | 17                   | -50%                    | 42                    | 140%                    |
|         | 2) Left lobe liver          | 28           | 16                   | -42%                    | 32                    | 96%                     |
| 5       | Node                        | 24           | 11                   | -53%                    | 28                    | 157%                    |
| 6       | Left Kidney                 | 10           | 18                   | 88%                     | 16                    | -11%                    |
| 7       | Right Kidney                | 16           | 16                   | 1%                      | 14                    | -15%                    |
| 8       | Left Kidney                 | 29           | 14                   | -50%                    | 17                    | 19%                     |
| 9       | Right Kidney                | 27           | 24                   | -13%                    | 30                    | 25%                     |
| 10      | 1) Nephrectomy Surgical Bed | 19           | 20                   | 3%                      | 15                    | -25%                    |
|         | 2) Node                     | 19           | 14                   | -24%                    | 6                     | -55%                    |
| 11      | 1) Node                     | 17           | 8                    | -53%                    | 11                    | 36%                     |
|         | 2) Node                     | 10           | 16                   | 52%                     | 4                     | -76%                    |
|         | 1) Left Liver               | 14           | 23                   | 68%                     | 7                     | -68%                    |
| 12      | 2) Left Kidney (anterior)   | 18           | 35                   | 98%                     | 21                    | -40%                    |
|         | 3) Left Kidney (lower)      | 24           | 74                   | 208%                    | 39                    | -48%                    |
|         | 4) Pancreas body            | 22           | 24                   | 11%                     | 21                    | -15%                    |
|         | 5) Pancreas tail            | 23           | 5                    | -78%                    | 18                    | 238%                    |
| 13      | 1) Left Kidney              | 16           | 18                   | 18%                     | 19                    | 3%                      |
|         | 2) Pancreas                 | 12           | 16                   | 32%                     | 18                    | 10%                     |
| 14      | Right Kidney                | 33           | 13                   | -62%                    | 13                    | 5%                      |

**Table S4.** Baseline and follow-up ECV mean transit time (MTT) (s) estimates per measured tumour target lesion for each patient with percentage changes.

| Patient | Target Lesion Site          | Baseline MRI | 4-week Follow-up MRI | % Change from Last Scan | 10-week Follow-up MRI | % Change from Last Scan |
|---------|-----------------------------|--------------|----------------------|-------------------------|-----------------------|-------------------------|
| 1       | Node                        | 26           | 30                   | 18%                     | 63                    | 110%                    |
| 2       | 1) Spleen                   | 21           | 174                  | 713%                    | 24                    | -86%                    |
|         | 2) Gastric                  | 38           | 97                   | 152%                    | 32                    | -67%                    |
| 3       | Node                        | 7            | 28                   | 272%                    | 26                    | -6%                     |
| 4       | 1) Right lobe liver         | 22           | 18                   | -17%                    | 18                    | 1%                      |
|         | 2) Left lobe liver          | 18           | 13                   | -28%                    | 11                    | -12%                    |
| 5       | Node                        | 12           | 26                   | 114%                    | 29                    | 9%                      |
| 6       | Left Kidney                 | 12           | 25                   | 105%                    | 13                    | -49%                    |
| 7       | Right Kidney                | 16           | 24                   | 49%                     | 30                    | 25%                     |
| 8       | Left Kidney                 | 10           | 29                   | 192%                    | 43                    | 48%                     |
| 9       | Right Kidney                | 14           | 17                   | 24%                     | 10                    | -43%                    |
| 10      | 1) Nephrectomy Surgical Bed | 27           | 25                   | -6%                     | 28                    | 14%                     |
|         | 2) Node                     | 26           | 15                   | -41%                    | 12                    | -20%                    |
| 11      | 1) Node                     | 10           | 37                   | 281%                    | 37                    | -1%                     |
|         | 2) Node                     | 13           | 26                   | 97%                     | 102                   | 290%                    |
| 12      | 1) Left Liver               | 16           | 64                   | 298%                    | 25                    | -61%                    |
|         | 2) Left Kidney (anterior)   | 34           | 36                   | 4%                      | 28                    | -22%                    |
|         | 3) Left Kidney (lower)      | 20           | 43                   | 114%                    | 22                    | -50%                    |
|         | 4) Pancreas body            | 8            | 37                   | 344%                    | 10                    | -73%                    |
|         | 5) Pancreas tail            | 8            | 28                   | 257%                    | 10                    | -63%                    |
| 13      | 1) Left Kidney              | 19           | 56                   | 192%                    | 55                    | -2%                     |
|         | 2) Pancreas                 | 7            | 25                   | 265%                    | 18                    | -29%                    |
| 14      | Right Kidney                | 21           | 44                   | 111%                    | 60                    | 38%                     |
